# Supplementary material
Source: Research Square preprint supplement (doi:10.21203/rs.3.rs-9310821/v1)
Supplement: Supplementary file 1 [file 63e58bfc6f31f4cb7220dd7c.pdf]

**Table 1.** Baseline characteristics of the study participants.

| Baseline | All(N=188)  | Li-ESWT(N=53) | Li-ESWT+Tadalafil(N=135) | P     |
|----------|-------------|---------------|--------------------------|-------|
| Age      | 36.47±10.29 | 36.66±11.04   | 36.39±10.03              | 0.873 |
| BMI      | 24.33±2.84  | 24.70±2.92    | 24.19±2.81               | 0.263 |
| IIEF-5   | 11.73±4.40  | 12.32±4.56    | 11.13±4.36               | 0.099 |
| EHS      | 2.36±0.63   | 2.47±0.64     | 2.27±0.62                | 0.052 |

BMI, Body Mass Index; IIEF-5, International Index of Erectile Function 5; EHS, Erection Hardness Score; Li-ESWT, low-intensity extracorporeal shockwave therapy.

**Table 2.** Comparison of IIEF-5 and EHS after Li-ESWT+Tadalafil vs. Li-ESWT+Tadalafil in different severity ED group

| Parameters | Group             | All ED      | Mild ED    | Mo-Se ED     |
|------------|-------------------|-------------|------------|--------------|
| IIEF-5     | Li-ESWT           | 15.15±5.37  | 18.48±3.10 | 9.65±3.38    |
|            | Li-ESWT+Tadalafil | 15.47±5.64  | 18.16±4.52 | 13.26±5.59** |
|            | P value           | 0.727       | 0.679      | 0.001        |
| Δ IIEF-5   | Li-ESWT           | 2.92±2.57   | 3.24±2.50  | 2.40±2.66    |
|            | Li-ESWT+Tadalafil | 4.60±4.24** | 3.30±2.79  | 5.68±4.97*** |
|            | P value           | 0.001       | 0.919      | <0.001       |
| EHS        | Li-ESWT           | 2.81±0.71   | 3.12±0.48  | 2.30±0.73    |
|            | Li-ESWT+Tadalafil | 2.80±0.70   | 2.98±0.63  | 2.70±0.78*   |
|            | P value           | 0.921       | 0.281      | 0.042        |
| Δ EHS      | Li-ESWT           | 0.38±0.49   | 0.33±0.48  | 0.50±0.11    |
|            | Li-ESWT+Tadalafil | 0.53±0.58   | 0.49±0.59  | 0.68±0.08    |
|            | P value           | 0.066       | 0.160      | 0.161        |

\*p<0.05, \*\*p<0.01, \*\*\*p<0.001 Δ, difference value

IIEF-5, International Index of Erectile Function 5; EHS, Erection Hardness Score; Li-ESWT, Low-intensity extracorporeal shockwave therapy.

**Table 3.** Patients marking “improved” response to CGI and attaining MCID in the IIEF-5 at 3-month.

| Parameters | Group             | All ED        | Mild ED     | Mo-Se ED      |
|------------|-------------------|---------------|-------------|---------------|
| CGI (%)    | Li-ESWT           | 56.6(30/53)   | 66.7(22/33) | 40.0(8/20)    |
|            | Li-ESWT+Tadalafil | 65.2(88/135)  | 71.4(45/63) | 58.3(42/72)*  |
|            | P value           | 0.273         | 0.629       | 0.045         |
| MCID(%)    | Li-ESWT           | 26.4(14/53)   | 30.3(10/33) | 20.0(4/20)    |
|            | Li-ESWT+Tadalafil | 42.2(57/135)* | 25.4(16/63) | 56.2(41/72)** |
|            | P value           | 0.044         | 0.607       | 0.004         |

\*p<0.05, \*\*p<0.01, \*\*\*p<0.001

CGI, Clinical Global Impression scale; MCID, Minimal clinically important difference
